# Supplementary material for: Comparing and quantifying goethite, hematite, lepidocrocite, and ferrihydrite by FTIR
Source: Research Square preprint supplement (doi:10.21203/rs.3.rs-8741763/v1), 2026-02-10
Supplement: Supplementary file 1 [file 7e8b0e1c1db7d7ec38436e94.docx]

Supporting information to:

**Comparing and quantifying goethite, hematite, lepidocrocite, and ferrihydrite by FTIR**

**Authors**

*Ruth H. Ellerbrock 1,* Nisha Bhattarai 1, *Jörg Schaller 1,2**

**Affiliations**

1 Leibniz Centre for Agricultural Landscape Research (ZALF), 15374 Müncheberg, Germany

2 Julius Liebig University Gießen, Germany


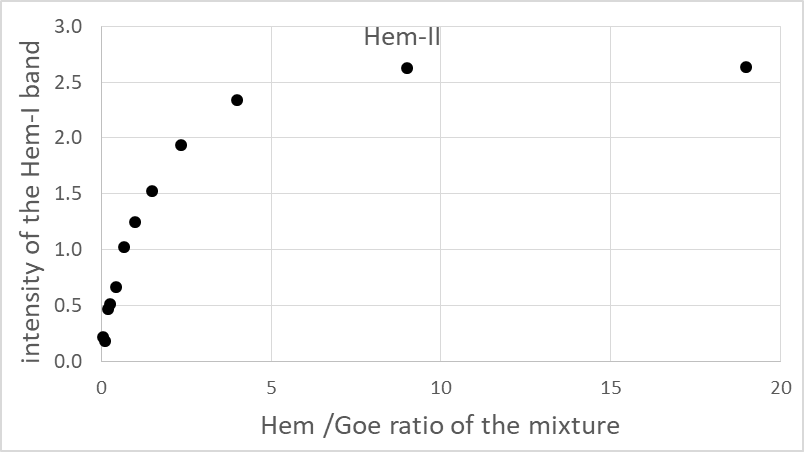


Figure S1 Intensity of Hem-I band maximum vs. the Hem/Goe weight ratio of the studied mixtures.

| 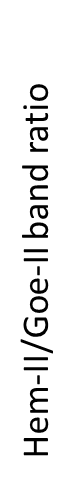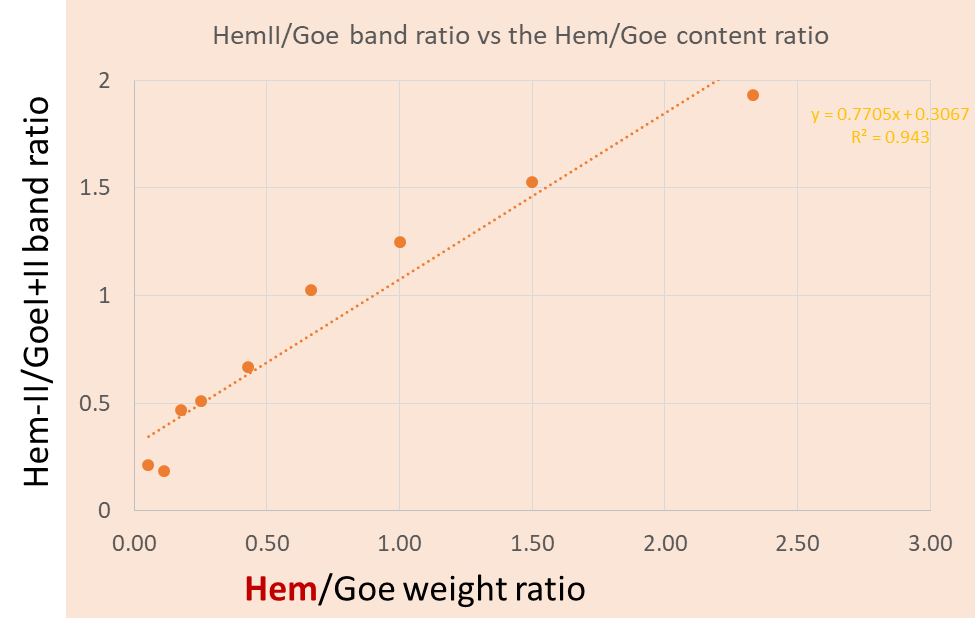b) | 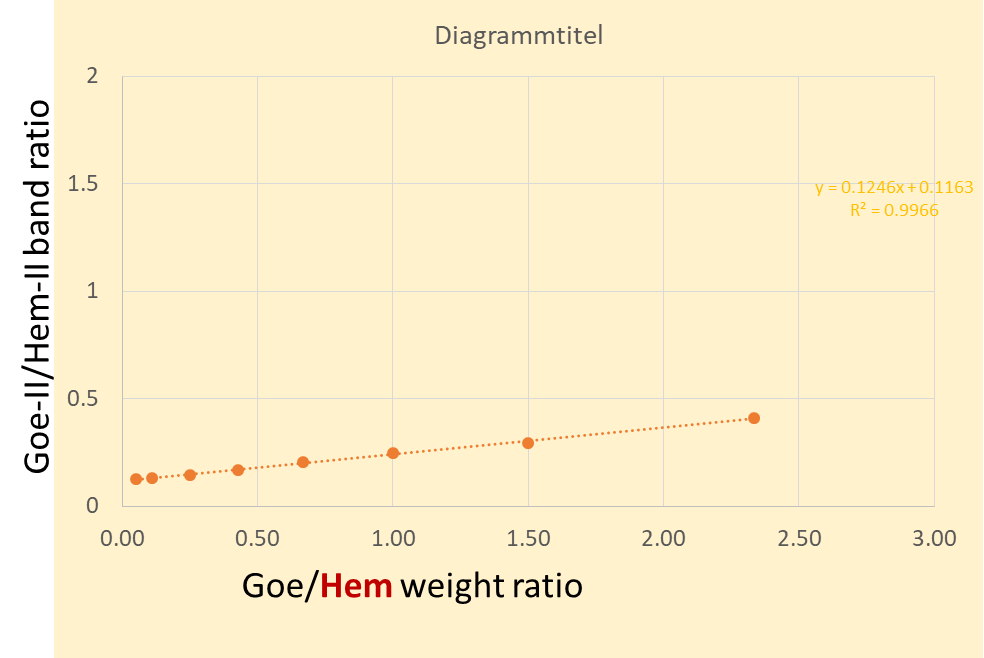  c) |
| --- | --- |

Fig. S2 a) Hem-II/Goe-II and b) Goe-II/Hem-II band ratios in the FTIR of Goethite-Hematite mixtures vs the respective weight ratios a) Hem/Goe and b) Goe/Hem a ratio of 0.05 to 2.5.
